# Supplementary material for: Randomized Trial of Early Enhanced Parenteral Nutrition and Later Neurodevelopment in Preterm Infants
Source: MDPI journal article supplement (doi:10.3390/nu14193890), 2022-09-20
Supplement: s1 [file s1]

# Randomized Trial of Early Enhanced Parenteral Nutrition and Later Neurodevelopment in Preterm Infants

Erin E. Morris <sup>1</sup>, Neely C. Miller <sup>2</sup>, Nicholas A. Marka <sup>3</sup>, Jennifer L. Super <sup>1</sup>, Emily M. Nagel <sup>4</sup>, Juan David Gonzalez <sup>5</sup>, Ellen W. Demerath <sup>4</sup> and Sara E. Ramel <sup>1,2,\*</sup>

**Table S1.** Parenteral nutrition protocol during first week of life for the Intervention and Standard Groups.

|              |                       | Day 1 | Day 2 | Day 3 | Day 4 | Day 5 | Day 6 | Day 7 |
|--------------|-----------------------|-------|-------|-------|-------|-------|-------|-------|
| Intervention | GIR<br>(mg/kg/min)    | 5.5   | 7     | 8.5   | 10    | 11.5  | 12    | 12    |
|              | IL<br>(g/kg)          | 2     | 3     | 3.5   | 3.5   | 3.5   | 3.5   | 3.5   |
|              | Calories<br>(kcal/kg) | 47.5  | 55    | 77.5  | 85    | 92.5  | 95    | 95    |
| Standard     | GIR<br>(mg/kg/min)    | 4.2   | 5     | 6     | 7     | 8     | 9     | 10    |
|              | IL<br>(g/kg)          | 0.5   | 1.5   | 2.5   | 3.5   | 3.5   | 3.5   | 3.5   |
|              | Calories<br>(kcal/kg) | 26    | 40    | 55    | 70    | 75    | 80    | 85    |

Each g/kg of IL (Intralipid) provides 10 kcal/kg.

Each 1 mg/kg/min of GIR (Glucose Infusion Rate) provides ~5 kcal/kg.

## Results of Inverse Probability Weighting and Sensitivity Analysis for Attrition Bias

Table S2. Demographics &amp; Inpatient Nutrition by Missing VEP Status.

|                                         | Missing<br>(N = 54) | Present<br>(N = 33) | p-value |
|-----------------------------------------|---------------------|---------------------|---------|
| Gestational Age [weeks]                 |                     |                     | 0.417   |
| Mean (SD)                               | 27 (2.6)            | 27.5 (2.4)          |         |
| Birth Weight [kg]                       |                     |                     | 0.736   |
| Mean (SD)                               | 0.9 (0.3)           | 1 (0.3)             |         |
| Sex                                     |                     |                     | 0.599   |
| Female                                  | 25 (46.3%)          | 18 (54.5%)          |         |
| Male                                    | 29 (53.7%)          | 15 (45.5%)          |         |
| Race                                    |                     |                     | 0.384*  |
| Asian                                   | 6 (11.1%)           | 1 (3%)              |         |
| Black/African American                  | 7 (13%)             | 2 (6.1%)            |         |
| White/Caucasian                         | 31 (57.4%)          | 25 (75.8%)          |         |
| More Than One Race                      | 2 (3.7%)            | 0 (0%)              |         |
| Other/Unknown                           | 8 (14.8%)           | 5 (15.2%)           |         |
| White Race Status                       |                     |                     | 0.133   |
| White                                   | 25 (75.8%)          | 31 (57.4%)          |         |
| Non-White                               | 8 (24.2%)           | 23 (42.6%)          |         |
| Ethnicity                               |                     |                     | 0.941*  |
| Hispanic or Latino                      | 7 (13%)             | 4 (12.1%)           |         |
| Not Hispanic or Latino                  | 38 (70.4%)          | 22 (66.7%)          |         |
| Unknown/Not Reported                    | 9 (16.7%)           | 7 (21.2%)           |         |
| Maternal Age [years]                    |                     |                     | > 0.99  |
| Mean (SD)                               | 30.7 (6.2)          | 30.7 (4.8)          |         |
| Antenatal Corticosteroid Use            |                     |                     | 0.048*  |
| Yes                                     | 46 (85.2%)          | 32 (97%)            |         |
| No                                      | 7 (13%)             | 0 (0%)              |         |
| Unknown                                 | 1 (1.9%)            | 1 (3%)              |         |
| SGA                                     |                     |                     | 0.641*  |
| Yes                                     | 2 (4%)              | 2 (6.2%)            |         |
| No                                      | 48 (96%)            | 30 (93.8%)          |         |
| Twin Status                             |                     |                     | 0.668   |
| Twin                                    | 15 (27.8%)          | 7 (21.2%)           |         |
| Not A Twin                              | 39 (72.2%)          | 26 (78.8%)          |         |
| Apgar Score at 5 Min                    |                     |                     | 0.353   |
| Mean (SD)                               | 6.9 (2)             | 7.2 (1.6)           |         |
| Antibiotic Use (Days 1–7) [days]        |                     |                     | 0.613   |
| Mean (SD)                               | 2 (2)               | 1.7 (1.8)           |         |
| SNAPPE II Scores                        |                     |                     | 0.283   |
| Mean (SD)                               | 27 (25.9)           | 21.8 (18.8)         |         |
| Nec Status                              |                     |                     | 0.703*  |
| Yes                                     | 5 (9.4%)            | 2 (6.1%)            |         |
| No                                      | 48 (90.6%)          | 31 (93.9%)          |         |
| Chronic Lung Disease or BPD at 36 Weeks |                     |                     | 0.747   |
| Yes                                     | 32 (66.7%)          | 20 (60.6%)          |         |
| No                                      | 16 (33.3%)          | 13 (39.4%)          |         |
| IVH Status                              |                     |                     | 0.233*  |

|                                                                         |             |             |       |
|-------------------------------------------------------------------------|-------------|-------------|-------|
| None/Grade 1                                                            | 43 (79.6%)  | 30 (90.9%)  |       |
| Grade 2/3/4                                                             | 11 (20.4%)  | 3 (9.1%)    |       |
| ROP Status                                                              |             |             | 0.776 |
| None/Stage 0/1                                                          | 36 (76.6%)  | 27 (81.8%)  |       |
| Stage 2/3                                                               | 11 (23.4%)  | 6 (18.2%)   |       |
| Average Intake (Total Enteral + Parenteral) Days 2–8 [kcal/kg/day]      |             |             | 0.213 |
| Mean (SD)                                                               | 94.4 (17.1) | 98.5 (13.1) |       |
| Average Protein Intake (Total Enteral + Parenteral) Days 2–8 [g/kg/day] |             |             | 0.197 |
| Mean (SD)                                                               | 4.1 (0.4)   | 4.2 (0.3)   |       |
| Average Enteral Intake Days 2–8 [kcal/kg/day]                           |             |             | 0.375 |
| Mean (SD)                                                               | 21.4 (19.4) | 25 (17.6)   |       |
| Average Enteral Protein Intake Days 2–8 [g/kg/day]                      |             |             | 0.9   |
| Mean (SD)                                                               | 0.7 (0.7)   | 0.7 (0.6)   |       |
| Average Parenteral Intake Days 2–8 [kcal/kg/day]                        |             |             | 0.878 |
| Mean (SD)                                                               | 72.9 (12.7) | 73.4 (15.2) |       |
| Average Parenteral Protein Intake Days 2–8 [g/kg/day]                   |             |             | 0.499 |
| Mean (SD)                                                               | 3.5 (0.5)   | 3.6 (0.3)   |       |
| Mean Day of Enteral Feed Initiation (SD)                                | 2.6 (5.5)   | 2.3 (5)     | 0.784 |
| Hyperglycemia Days 2–8 [days]                                           |             |             | 0.918 |
| Mean (SD)                                                               | 2.2 (2.6)   | 2.3 (2.8)   |       |
| Hypertriglyceridemia Days 2–8 [days]                                    |             |             | 0.289 |
| Mean (SD)                                                               | 0.3 (0.6)   | 0.2 (0.6)   |       |
| Hyperbilirubinemia Days 2–8 [days]                                      |             |             | 0.43  |
| Mean (SD)                                                               | 0.3 (1.2)   | 0.1 (0.5)   |       |

**Table S3.** Demographics & Inpatient Nutrition by Missing 1 Year Bayley Status.

|                                         | Missing<br>(N = 41) | Present<br>(N = 46) | p-value |
|-----------------------------------------|---------------------|---------------------|---------|
| Gestational Age [weeks]                 |                     |                     | 0.563   |
| Mean (SD)                               | 27 (2.4)            | 27.3 (2.7)          |         |
| Birth Weight [kg]                       |                     |                     | 0.92    |
| Mean (SD)                               | 0.9 (0.3)           | 0.9 (0.3)           |         |
| Sex                                     |                     |                     | > 0.99  |
| Female                                  | 20 (48.8%)          | 23 (50%)            |         |
| Male                                    | 21 (51.2%)          | 23 (50%)            |         |
| Race                                    |                     |                     | 0.035*  |
| Asian                                   | 4 (9.8%)            | 3 (6.5%)            |         |
| Black/African American                  | 7 (17.1%)           | 2 (4.3%)            |         |
| White/Caucasian                         | 20 (48.8%)          | 36 (78.3%)          |         |
| More Than One Race                      | 2 (4.9%)            | 0 (0%)              |         |
| Other/Unknown                           | 8 (19.5%)           | 5 (10.9%)           |         |
| White Race Status                       |                     |                     | 0.008   |
| White                                   | 20 (48.8%)          | 36 (78.3%)          |         |
| Non-White                               | 21 (51.2%)          | 10 (21.7%)          |         |
| Ethnicity                               |                     |                     | 0.481*  |
| Hispanic or Latino                      | 7 (17.1%)           | 4 (8.7%)            |         |
| Not Hispanic or Latino                  | 26 (63.4%)          | 34 (73.9%)          |         |
| Unknown/Not Reported                    | 8 (19.5%)           | 8 (17.4%)           |         |
| Maternal Age [years]                    |                     |                     | 0.033   |
| Mean (SD)                               | 29.2 (6.9)          | 32 (3.9)            |         |
| Antenatal Corticosteroid Use            |                     |                     | 0.331*  |
| Yes                                     | 35 (85.4%)          | 43 (93.5%)          |         |
| No                                      | 4 (9.8%)            | 3 (6.5%)            |         |
| Unknown                                 | 2 (4.9%)            | 0 (0%)              |         |
| SGA                                     |                     |                     | 0.62*   |
| Yes                                     | 1 (2.6%)            | 3 (6.8%)            |         |
| No                                      | 37 (97.4%)          | 41 (93.2%)          |         |
| Twin Status                             |                     |                     | 0.292   |
| Twin                                    | 13 (31.7%)          | 9 (19.6%)           |         |
| Not A Twin                              | 28 (68.3%)          | 37 (80.4%)          |         |
| Apgar Score at 5 Min                    |                     |                     | 0.775   |
| Mean (SD)                               | 7 (1.8)             | 6.9 (1.9)           |         |
| Antibiotic Use (Days 1-7) [days]        |                     |                     | 0.617   |
| Mean (SD)                               | 2.3 (1.7)           | 2.6 (2)             |         |
| SNAPPE II Scores                        |                     |                     | 0.383   |
| Mean (SD)                               | 22.7 (19.9)         | 27.1 (26.2)         |         |
| Nec Status                              |                     |                     | 0.704*  |
| Yes                                     | 4 (9.8%)            | 3 (6.7%)            |         |
| No                                      | 37 (90.2%)          | 42 (93.3%)          |         |
| Chronic Lung Disease or BPD at 36 Weeks |                     |                     | 0.65    |
| Yes                                     | 21 (60%)            | 31 (67.4%)          |         |
| No                                      | 14 (40%)            | 15 (32.6%)          |         |
| IVH Status                              |                     |                     | 0.154*  |
| None/Grade 1                            | 37 (90.2%)          | 36 (78.3%)          |         |

|                                                                         |              |               |        |
|-------------------------------------------------------------------------|--------------|---------------|--------|
| Grade 2/3/4                                                             | 4 (9.8%)     | 10 (21.7%)    |        |
| ROP Status                                                              |              |               | > 0.99 |
| None/Stage 0/1                                                          | 28 (80%)     | 35 (77.8%)    |        |
| Stage 2/3                                                               | 7 (20%)      | 10 (22.2%)    |        |
| Average Intake (Total Enteral + Parenteral) Days 2–8 [kcal/kg/day]      |              |               | 0.946  |
| Mean (SD)                                                               | 95.8 (16.2)  | 96 (15.6)     |        |
| Average Protein Intake (Total Enteral + Parenteral) Days 2–8 [g/kg/day] |              |               | 0.348  |
| Mean (SD)                                                               | 4.2 (0.3)    | 4.1 (0.5)     |        |
| Average Enteral Intake Days 2–8 [kcal/kg/day]                           |              |               | 0.22   |
| Mean (SD)                                                               | 25.4 (19.8)  | 20.5 (17.6)   |        |
| Average Enteral Protein Intake Days 2–8 [g/kg/day]                      |              |               | 0.246  |
| Mean (SD)                                                               | 0.8 (0.7)    | 0.6 (0.7)     |        |
| Average Parenteral Intake Days 2–8 [kcal/kg/day]                        |              |               | 0.07   |
| Mean (SD)                                                               | 70.4 (11.9)  | 75.6 (14.6)   |        |
| Average Parenteral Protein Intake Days 2–8 [g/kg/day]                   |              |               | 0.309  |
| Mean (SD)                                                               | 3.5 (0.4)    | 3.6 (0.5)     |        |
| Kcal Deficit Over Stay (120 kcal/day goal)                              |              |               | 0.424  |
| Mean (SD)                                                               | 50.9 (672.6) | 166.7 (670.8) |        |
| Protein Deficit Over Stay (4 g/day goal)                                |              |               | 0.147  |
| Mean (SD)                                                               | −9.9 (18.3)  | −3 (25.6)     |        |
| Mean Day of Enteral Feed Initiation                                     | 1.9 (1.5)    | 3.1 (7.1)     | 0.242  |
| Insulin Use Days 2–8 [days]                                             |              |               | 0.601  |
| Mean (SD)                                                               | 1.2 (2.3)    | 1.5 (2.3)     |        |
| Hyperglycemia Days 2–8 [days]                                           |              |               | 0.759  |
| Mean (SD)                                                               | 2.2 (2.6)    | 2.3 (2.7)     |        |
| Hypertriglyceridemia Days 2–8 [days]                                    |              |               | 0.392  |
| Mean (SD)                                                               | 0.2 (0.5)    | 0.3 (0.7)     |        |
| Hyperbilirubinemia Days 2–8 [days]                                      |              |               | 0.983  |
| Mean (SD)                                                               | 0.2 (1.1)    | 0.2 (0.9)     |        |

**Table S4.** Demographics & Inpatient Nutrition by Missing 2 Year Bayley Status.

|                                         | <b>Missing<br/>(N = 58)</b> | <b>Present<br/>(N = 29)</b> | <b>p-value</b> |
|-----------------------------------------|-----------------------------|-----------------------------|----------------|
| Gestational Age [weeks]                 |                             |                             | 0.711          |
| Mean (SD)                               | 27.1 (2.5)                  | 27.3 (2.7)                  |                |
| Birth Weight [kg]                       |                             |                             | 0.58           |
| Mean (SD)                               | 1 (0.3)                     | 0.9 (0.3)                   |                |
| Sex                                     |                             |                             | > 0.99         |
| Female                                  | 29 (50%)                    | 14 (48.3%)                  |                |
| Male                                    | 29 (50%)                    | 15 (51.7%)                  |                |
| Race                                    |                             |                             | 0.288*         |
| Asian                                   | 6 (10.3%)                   | 1 (3.4%)                    |                |
| Black/African American                  | 8 (13.8%)                   | 1 (3.4%)                    |                |
| White/Caucasian                         | 33 (56.9%)                  | 23 (79.3%)                  |                |
| More Than One Race                      | 2 (3.4%)                    | 0 (0%)                      |                |
| Other/Unknown                           | 9 (15.5%)                   | 4 (13.8%)                   |                |
| White Race Status                       |                             |                             | 0.069          |
| White                                   | 33 (56.9%)                  | 23 (79.3%)                  |                |
| Non-White                               | 25 (43.1%)                  | 6 (20.7%)                   |                |
| Ethnicity                               |                             |                             | 0.646*         |
| Hispanic or Latino                      | 8 (13.8%)                   | 3 (10.3%)                   |                |
| Not Hispanic or Latino                  | 41 (70.7%)                  | 19 (65.5%)                  |                |
| Unknown/Not Reported                    | 9 (15.5%)                   | 7 (24.1%)                   |                |
| Maternal Age [years]                    |                             |                             | 0.061          |
| Mean (SD)                               | 30 (6.1)                    | 32.1 (4.2)                  |                |
| Antenatal Corticosteroid Use            |                             |                             | 0.717*         |
| Yes                                     | 52 (89.7%)                  | 26 (89.7%)                  |                |
| No                                      | 4 (6.9%)                    | 3 (10.3%)                   |                |
| Unknown                                 | 2 (3.4%)                    | 0 (0%)                      |                |
| SGA                                     |                             |                             | 0.102*         |
| Yes                                     | 1 (1.8%)                    | 3 (11.1%)                   |                |
| No                                      | 54 (98.2%)                  | 24 (88.9%)                  |                |
| Twin Status                             |                             |                             | 0.337          |
| Twin                                    | 17 (29.3%)                  | 5 (17.2%)                   |                |
| Not A Twin                              | 41 (70.7%)                  | 24 (82.8%)                  |                |
| Apgar Score at 5 Min                    |                             |                             | 0.015          |
| Mean (SD)                               | 2 (3.4)                     | 6 (20.7)                    |                |
| Antibiotic Use (Days 1-7) [days]        |                             |                             | 0.818          |
| Mean (SD)                               | 2.5 (2)                     | 2.4 (1.5)                   |                |
| SNAPPE II Scores                        |                             |                             | 0.223          |
| Mean (SD)                               | 22.6 (20.3)                 | 29.9 (28.4)                 |                |
| Nec Status                              |                             |                             | > 0.99*        |
| Yes                                     | 5 (8.6%)                    | 2 (7.1%)                    |                |
| No                                      | 53 (91.4%)                  | 26 (92.9%)                  |                |
| Chronic Lung Disease or BPD at 36 Weeks |                             |                             | 0.363          |
| Yes                                     | 31 (59.6%)                  | 21 (72.4%)                  |                |
| No                                      | 21 (40.4%)                  | 8 (27.6%)                   |                |
| IVH Status                              |                             |                             | 0.606          |
| None/Grade 1                            | 50 (86.2%)                  | 23 (79.3%)                  |                |

|                                                                         |             |              |       |
|-------------------------------------------------------------------------|-------------|--------------|-------|
| Grade 2/3/4                                                             | 8 (13.8%)   | 6 (20.7%)    |       |
| ROP Status                                                              |             |              | 0.797 |
| None/Stage 0/1                                                          | 40 (76.9%)  | 23 (82.1%)   |       |
| Stage 2/3                                                               | 12 (23.1%)  | 5 (17.9%)    |       |
| Average Intake (Total Enteral + Parenteral) Days 2–8 [kcal/kg/day]      |             |              | 0.612 |
| Mean (SD)                                                               | 95.3 (15.5) | 97.2 (16.4)  |       |
| Average Protein Intake (Total Enteral + Parenteral) Days 2–8 [g/kg/day] |             |              | 0.743 |
| Mean (SD)                                                               | 4.2 (0.4)   | 4.2 (0.2)    |       |
| Average Enteral Intake Days 2–8 [kcal/kg/day]                           |             |              | 0.384 |
| Mean (SD)                                                               | 24 (19.2)   | 20.4 (17.7)  |       |
| Average Enteral Protein Intake Days 2–8 [g/kg/day]                      |             |              | 0.475 |
| Mean (SD)                                                               | 0.7 (0.7)   | 0.6 (0.7)    |       |
| Average Parenteral Intake Days 2–8 [kcal/kg/day]                        |             |              | 0.089 |
| Mean (SD)                                                               | 71.3 (12.9) | 76.8 (14.5)  |       |
| Average Parenteral Protein Intake Days 2–8 [g/kg/day]                   |             |              | 0.084 |
| Mean (SD)                                                               | 3.5 (0.4)   | 3.7 (0.4)    |       |
| Kcal Deficit Over Stay (120 kcal/day goal)                              |             |              | 0.688 |
| Mean (SD)                                                               | 133.3 (655) | 69.8 (709.7) |       |
| Protein Deficit Over Stay (4 g/day goal)                                |             |              | 0.934 |
| Mean (SD)                                                               | −6.1 (22.5) | −6.6 (23.1)  |       |
| Mean Day of Enteral Feed Initiation                                     | 2.6 (5.5)   | 2.5 (5.1)    | 0.954 |
| Insulin Use Days 2–8 [days]                                             |             |              | 0.717 |
| Mean (SD)                                                               | 1.3 (2.3)   | 1.5 (2.3)    |       |
| Hyperglycemia Days 2–8 [days]                                           |             |              | 0.72  |
| Mean (SD)                                                               | 2.2 (2.6)   | 2.4 (2.8)    |       |
| Hypertriglyceridemia Days 2–8 [days]                                    |             |              | 0.479 |
| Mean (SD)                                                               | 0.3 (0.6)   | 0.4 (0.6)    |       |
| Hyperbilirubinemia Days 2–8 [days]                                      |             |              | 0.502 |
| Mean (SD)                                                               | 0.1 (0.9)   | 0.3 (1.1)    |       |

## Sensitivity Analysis - Attrition Bias (Tables S5–S13)

**Table S5.** ERP/VEP Analysis - Model 1 (Adjusted for Sex, Gestational Age, and Age at Test [VEP/ERP Only]).

| VEP - P100 Latency                     |                 | Control (N = 18)   Intervention (N = 15) |         |
|----------------------------------------|-----------------|------------------------------------------|---------|
| Study Arm: Intervention [ref. Control] |                 |                                          |         |
| Sex: Male [ref. Female]                |                 |                                          |         |
| Gestation Age [weeks]                  |                 |                                          |         |
| Age at ERP/VEP Test [days]             |                 |                                          |         |
|                                        | Effect Estimate | 95% CI                                   | p-value |
| VEP - P100 Latency                     |                 |                                          |         |
| Study Arm: Intervention [ref. Control] | 34.61           | (11.97, 57.25)                           | 0.004   |
| Sex: Male [ref. Female]                | -6.83           | (-29.17, 15.5)                           | 0.536   |
| Gestation Age [weeks]                  | 0.77            | (-4.23, 5.77)                            | 0.755   |
| Age at ERP/VEP Test [days]             | -0.06           | (-0.93, 0.81)                            | 0.881   |



**Table S6.** ERP/VEP Analysis - Model 2 (Adjusted for Sex, Gestational Age, Kcal/kg from Feeds, and Age at Test [VEP/ERP Only]).

| VEP - P100 Latency                            |                 |                |                 |
|-----------------------------------------------|-----------------|----------------|-----------------|
| Control (N = 18)   Intervention (N = 15)      |                 |                |                 |
| Study Arm: Intervention [ref. Control]        |                 |                |                 |
| Sex: Male [ref. Female]                       |                 |                |                 |
| Gestation Age [weeks]                         |                 |                |                 |
| Average Enteral Intake Days 2–8 [kcal/kg/day] |                 |                |                 |
| Age at ERP/VEP Test [days]                    |                 |                |                 |
|                                               | Effect Estimate | 95% CI         | <i>p</i> -value |
| VEP - P100 Latency                            |                 |                |                 |
| Study Arm: Intervention [ref. Control]        | 22.43           | (−4.81, 49.68) | 0.103           |
| Sex: Male [ref. Female]                       | −15.4           | (−40.17, 9.37) | 0.213           |
| Gestation Age [weeks]                         | 4.14            | (−2.58, 10.87) | 0.217           |
| Average Enteral Intake Days 2–8 [kcal/kg/day] | −0.66           | (−1.52, 0.2)   | 0.128           |
| Age at ERP/VEP Test [days]                    | 0.08            | (−0.8, 0.96)   | 0.854           |

**Table S7.** ERP/VEP Analysis - Model 3: Multivariable Condition by Specific Intake Days 2–8.

|                                    |                                          |                 |                |
|------------------------------------|------------------------------------------|-----------------|----------------|
| VEP - P100 Latency                 | Control (N = 18)   Intervention (N = 15) |                 |                |
| Average Total Intake [kcal/kg/day] |                                          |                 |                |
| Sex: Male [ref. Female]            |                                          |                 |                |
| Gestation Age [weeks]              |                                          |                 |                |
| Age at ERP/VEP Test [days]         |                                          |                 |                |
| VEP - P100 Latency                 | Control (N = 18)   Intervention (N = 15) |                 |                |
| Average Total Intake [kcal/kg/day] |                                          |                 |                |
| Sex: Male [ref. Female]            |                                          |                 |                |
| Gestation Age [weeks]              |                                          |                 |                |
| Age at ERP/VEP Test [days]         |                                          |                 |                |
| VEP - P100 Latency                 | Control (N = 18)   Intervention (N = 15) |                 |                |
| Average Total Intake [kcal/kg/day] |                                          |                 |                |
| Sex: Male [ref. Female]            |                                          |                 |                |
| Gestation Age [weeks]              |                                          |                 |                |
| Age at ERP/VEP Test [days]         |                                          |                 |                |
| VEP - P100 Latency                 | Control (N = 18)   Intervention (N = 15) |                 |                |
| Average Total Intake [kcal/kg/day] |                                          |                 |                |
| Sex: Male [ref. Female]            |                                          |                 |                |
| Gestation Age [weeks]              |                                          |                 |                |
| Age at ERP/VEP Test [days]         |                                          |                 |                |
|                                    | <b>Effect Estimate</b>                   | <b>95% CI</b>   | <b>p-value</b> |
| VEP - P100 Latency                 |                                          |                 |                |
| Average Total Intake [kcal/kg/day] | −0.4                                     | (−1.83, 1.02)   | 0.567          |
| Sex: Male [ref. Female]            | 3.07                                     | (−22.19, 28.33) | 0.805          |
| Gestation Age [weeks]              | −0.25                                    | (−7.97, 7.46)   | 0.947          |
| Age at ERP/VEP Test [days]         | −0.22                                    | (−1.23, 0.8)    | 0.661          |
| VEP - P100 Latency                 |                                          |                 |                |
| Average Total Intake [kcal/kg/day] | −45.54                                   | (−99.38, 8.3)   | 0.094          |
| Sex: Male [ref. Female]            | −11.85                                   | (−42.43, 18.73) | 0.434          |
| Gestation Age [weeks]              | 2                                        | (−4.9, 8.91)    | 0.557          |
| Age at ERP/VEP Test [days]         | 0.15                                     | (−0.92, 1.23)   | 0.772          |
| VEP - P100 Latency                 |                                          |                 |                |
| Average Total Intake [kcal/kg/day] | −1.07                                    | (−1.79, −0.35)  | 0.005          |
| Sex: Male [ref. Female]            | −15.87                                   | (−41.4, 9.65)   | 0.213          |
| Gestation Age [weeks]              | 5.34                                     | (−1.43, 12.11)  | 0.213          |
| Age at ERP/VEP Test [days]         | 0.09                                     | (−0.81, 1)      | 0.832          |
| VEP - P100 Latency                 |                                          |                 |                |
| Average Total Intake [kcal/kg/day] | −26.26                                   | (−46.91, −5.62) | 0.015          |
| Sex: Male [ref. Female]            | −19.86                                   | (−49.28, 9.57)  | 0.178          |
| Gestation Age [weeks]              | 5.39                                     | (−2.12, 12.9)   | 0.153          |
| Age at ERP/VEP Test [days]         | 0.1                                      | (−0.85, 1.05)   | 0.83           |
| Average Total Intake [kcal/kg/day] | 1.01                                     | (0.24, 1.78)    | 0.012          |
| Sex: Male [ref. Female]            | −10.91                                   | (−35.97, 14.16) | 0.38           |
| Gestation Age [weeks]              | 1.1                                      | (−4.29, 6.49)   | 0.679          |

---

|                                    |        |                 |       |
|------------------------------------|--------|-----------------|-------|
| Age at ERP/VEP Test [days]         | −0.06  | (−0.97, 0.85)   | 0.892 |
| Average Total Intake [kcal/kg/day] | 46.54  | (11.72, 81.36)  | 0.011 |
| Sex: Male [ref. Female]            | −13.94 | (−39.99, 12.11) | 0.282 |
| Gestation Age [weeks]              | 4.01   | (−2.54, 10.56)  | 0.22  |
| Age at ERP/VEP Test [days]         | −0.08  | (−0.98, 0.82)   | 0.86  |

**Table S8.** Bayley Score - Year 1 - Model 1 (Adjusted for Sex, Gestational Age, and Age at Test [VEP/ERP Only]).

|                                        |                        |                                          |                |
|----------------------------------------|------------------------|------------------------------------------|----------------|
|                                        |                        |                                          |                |
| Bayley - 1 year: Cognitive             |                        | Control (N = 23)   Intervention (N = 23) |                |
| Study Arm: Intervention [ref. Control] |                        |                                          |                |
| Sex: Male [ref. Female]                |                        |                                          |                |
| Gestation Age [weeks]                  |                        |                                          |                |
| Bayley - 1 year: Cognitive             |                        | Control (N = 23)   Intervention (N = 23) |                |
| Study Arm: Intervention [ref. Control] |                        |                                          |                |
| Sex: Male [ref. Female]                |                        |                                          |                |
| Gestation Age [weeks]                  |                        |                                          |                |
| Bayley - 1 year: Cognitive             |                        | Control (N = 23)   Intervention (N = 23) |                |
| Study Arm: Intervention [ref. Control] |                        |                                          |                |
| Sex: Male [ref. Female]                |                        |                                          |                |
| Gestation Age [weeks]                  |                        |                                          |                |
|                                        | <b>Effect Estimate</b> | <b>95% CI</b>                            | <b>p-value</b> |
| Bayley - 1 year: Cognitive             |                        |                                          |                |
| Study Arm: Intervention [ref. Control] | 6.5                    | (-2.41, 15.42)                           | 0.148          |
| Sex: Male [ref. Female]                | 9.52                   | (0.55, 18.49)                            | 0.038          |
| Gestation Age [weeks]                  | 2.99                   | (1.38, 4.61)                             | < 0.001        |
| Bayley - 1 year: Cognitive             |                        |                                          |                |
| Study Arm: Intervention [ref. Control] | 3.14                   | (-6.17, 12.44)                           | 0.5            |
| Sex: Male [ref. Female]                | 3.85                   | (-5.51, 13.22)                           | 0.411          |
| Gestation Age [weeks]                  | 4.25                   | (2.53, 5.96)                             | < 0.001        |
| Bayley - 1 year: Cognitive             |                        |                                          |                |
| Study Arm: Intervention [ref. Control] | 3.47                   | (-6.36, 13.3)                            | 0.479          |
| Sex: Male [ref. Female]                | 7.27                   | (-2.67, 17.2)                            | 0.147          |
| Gestation Age [weeks]                  | 4.3                    | (2.52, 6.07)                             | < 0.001        |

**Table S9.** Bayley Score - Year 1 - Model 2 (Adjusted for Sex, Gestational Age, Kcal/kg from Feeds, and Age at Test [VEP/ERP Only]).

|                                               |                                          |                |                |
|-----------------------------------------------|------------------------------------------|----------------|----------------|
|                                               |                                          |                |                |
| Bayley - 1 year: Cognitive                    | Control (N = 23)   Intervention (N = 23) |                |                |
| Study Arm: Intervention [ref. Control]        |                                          |                |                |
| Sex: Male [ref. Female]                       |                                          |                |                |
| Gestation Age [weeks]                         |                                          |                |                |
| Average Enteral Intake Days 2–8 [kcal/kg/day] |                                          |                |                |
| Bayley - 1 year: Cognitive                    | Control (N = 23)   Intervention (N = 23) |                |                |
| Study Arm: Intervention [ref. Control]        |                                          |                |                |
| Sex: Male [ref. Female]                       |                                          |                |                |
| Gestation Age [weeks]                         |                                          |                |                |
| Average Enteral Intake Days 2–8 [kcal/kg/day] |                                          |                |                |
| Bayley - 1 year: Cognitive                    | Control (N = 23)   Intervention (N = 23) |                |                |
| Study Arm: Intervention [ref. Control]        |                                          |                |                |
| Sex: Male [ref. Female]                       |                                          |                |                |
| Gestation Age [weeks]                         |                                          |                |                |
| Average Enteral Intake Days 2–8 [kcal/kg/day] |                                          |                |                |
|                                               | <b>Effect Estimate</b>                   | <b>95% CI</b>  | <b>p-value</b> |
| Bayley - 1 year: Cognitive                    |                                          |                |                |
| Study Arm: Intervention [ref. Control]        | 6.44                                     | (−3.14, 16.03) | 0.181          |
| Sex: Male [ref. Female]                       | 9.53                                     | (0.41, 18.65)  | 0.041          |
| Gestation Age [weeks]                         | 3.02                                     | (0.91, 5.13)   | 0.006          |
| Average Enteral Intake Days 2–8 [kcal/kg/day] | −0.01                                    | (−0.34, 0.33)  | 0.97           |
| Bayley - 1 year: Cognitive                    |                                          |                |                |
| Study Arm: Intervention [ref. Control]        | 1.52                                     | (−8.4, 11.44)  | 0.758          |
| Sex: Male [ref. Female]                       | 4.13                                     | (−5.27, 13.53) | 0.379          |
| Gestation Age [weeks]                         | 4.88                                     | (2.71, 7.05)   | < 0.001        |
| Average Enteral Intake Days 2–8 [kcal/kg/day] | −0.16                                    | (−0.5, 0.18)   | 0.34           |
| Bayley - 1 year: Cognitive                    |                                          |                |                |
| Study Arm: Intervention [ref. Control]        | 2.09                                     | (−8.39, 12.57) | 0.689          |
| Sex: Male [ref. Female]                       | 7.57                                     | (−2.44, 17.59) | 0.134          |
| Gestation Age [weeks]                         | 4.88                                     | (2.56, 7.19)   | < 0.001        |
| Average Enteral Intake Days 2–8 [kcal/kg/day] | −0.15                                    | (−0.51, 0.22)  | 0.428          |

**Table S10.** Bayley Score - Year 1 - Model 3 - Multivariable Condition by Specific Intake Days 2–8.

|                                    |                                          |  |  |
|------------------------------------|------------------------------------------|--|--|
|                                    |                                          |  |  |
| Bayley - 1 Year: Cognitive         | Control (N = 23)   Intervention (N = 23) |  |  |
| Average Total Intake [kcal/kg/day] |                                          |  |  |
| Sex: Male [ref. Female]            |                                          |  |  |
| Gestation Age [weeks]              |                                          |  |  |
| Bayley - 1 Year: Cognitive         | Control (N = 23)   Intervention (N = 23) |  |  |
| Average Total Intake [kcal/kg/day] |                                          |  |  |
| Sex: Male [ref. Female]            |                                          |  |  |
| Gestation Age [weeks]              |                                          |  |  |
| Bayley - 1 Year: Cognitive         | Control (N = 23)   Intervention (N = 23) |  |  |
| Average Total Intake [kcal/kg/day] |                                          |  |  |
| Sex: Male [ref. Female]            |                                          |  |  |
| Gestation Age [weeks]              |                                          |  |  |
| Bayley - 1 Year: Cognitive         | Control (N = 23)   Intervention (N = 23) |  |  |
| Average Total Intake [kcal/kg/day] |                                          |  |  |
| Sex: Male [ref. Female]            |                                          |  |  |
| Gestation Age [weeks]              |                                          |  |  |
| Bayley - 1 Year: Cognitive         | Control (N = 23)   Intervention (N = 23) |  |  |
| Average Total Intake [kcal/kg/day] |                                          |  |  |
| Sex: Male [ref. Female]            |                                          |  |  |
| Gestation Age [weeks]              |                                          |  |  |
| Bayley - 1 Year: Cognitive         | Control (N = 23)   Intervention (N = 23) |  |  |
| Average Total Intake [kcal/kg/day] |                                          |  |  |
| Sex: Male [ref. Female]            |                                          |  |  |
| Gestation Age [weeks]              |                                          |  |  |
| Bayley - 1 Year: Cognitive         | Control (N = 23)   Intervention (N = 23) |  |  |
| Average Total Intake [kcal/kg/day] |                                          |  |  |
| Sex: Male [ref. Female]            |                                          |  |  |
| Gestation Age [weeks]              |                                          |  |  |
| Bayley - 1 Year: Cognitive         | Control (N = 23)   Intervention (N = 23) |  |  |
| Average Total Intake [kcal/kg/day] |                                          |  |  |
| Sex: Male [ref. Female]            |                                          |  |  |
| Gestation Age [weeks]              |                                          |  |  |
| Bayley - 1 Year: Cognitive         | Control (N = 23)   Intervention (N = 23) |  |  |
| Average Total Intake [kcal/kg/day] |                                          |  |  |
| Sex: Male [ref. Female]            |                                          |  |  |
| Gestation Age [weeks]              |                                          |  |  |
| Bayley - 1 Year: Cognitive         | Control (N = 23)   Intervention (N = 23) |  |  |
| Average Total Intake [kcal/kg/day] |                                          |  |  |
| Sex: Male [ref. Female]            |                                          |  |  |
| Gestation Age [weeks]              |                                          |  |  |

| Bayley - 1 Year: Cognitive         |                 | Control (N = 23)   Intervention (N = 23) |         |
|------------------------------------|-----------------|------------------------------------------|---------|
| Average Total Intake [kcal/kg/day] |                 |                                          |         |
| Sex: Male [ref. Female]            |                 |                                          |         |
| Gestation Age [weeks]              |                 |                                          |         |
|                                    | Effect Estimate | 95% CI                                   | p-value |
| Bayley - 1 Year: Cognitive         |                 |                                          |         |
| Average Total Intake [kcal/kg/day] | 0.16            | (−0.15, 0.48)                            | 0.309   |
| Sex: Male [ref. Female]            | 9.07            | (−0.02, 18.13)                           | 0.05    |
| Gestation Age [weeks]              | 2.47            | (0.5, 4.44)                              | 0.015   |
| Bayley - 1 Year: Language          |                 |                                          |         |
| Average Total Intake [kcal/kg/day] | −0.07           | (−0.4, 0.26)                             | 0.668   |
| Sex: Male [ref. Female]            | 3.26            | (−6.08, 12.59)                           | 0.485   |
| Gestation Age [weeks]              | 4.4             | (2.25, 6.56)                             | < 0.001 |
| Bayley - 1 Year: Cognitive         |                 |                                          |         |
| Average Total Intake [kcal/kg/day] | −0.03           | (−0.38, 0.32)                            | 0.862   |
| Sex: Male [ref. Female]            | 6.85            | (−3.1, 16.79)                            | 0.172   |
| Gestation Age [weeks]              | 4.4             | (2.25, 6.56)                             | < 0.001 |
| Bayley - 1 Year: Cognitive         |                 |                                          |         |
| Average Total Intake [kcal/kg/day] | −0.84           | (−8.97, 7.29)                            | 0.836   |
| Sex: Male [ref. Female]            | 8.85            | (−0.34, 18.03)                           | 0.059   |
| Gestation Age [weeks]              | 3.04            | (1.38, 4.71)                             | < 0.001 |
| Bayley - 1 Year: Cognitive         |                 |                                          |         |
| Average Total Intake [kcal/kg/day] | −4.3            | (−12.46, 3.86)                           | 0.293   |
| Sex: Male [ref. Female]            | 3.03            | (−6.2, 12.25)                            | 0.511   |
| Gestation Age [weeks]              | 4.28            | (2.58, 5.98)                             | < 0.001 |
| Bayley - 1 Year: Cognitive         |                 |                                          |         |
| Average Total Intake [kcal/kg/day] | −3.71           | (−12.51, 5.09)                           | 0.399   |
| Sex: Male [ref. Female]            | 6.61            | (−3.27, 16.48)                           | 0.184   |
| Gestation Age [weeks]              | 4.37            | (2.59, 6.16)                             | < 0.001 |
| Bayley - 1 Year: Cognitive         |                 |                                          |         |
| Average Total Intake [kcal/kg/day] | −0.08           | (−0.4, 0.24)                             | 0.611   |
| Sex: Male [ref. Female]            | 9.15            | (−0.04, 18.34)                           | 0.051   |
| Gestation Age [weeks]              | 3.34            | (−0.4, 6.16)                             | 0.002   |
| Bayley - 1 Year: Cognitive         |                 |                                          |         |
| Average Total Intake [kcal/kg/day] | −0.18           | (−0.5, 0.14)                             | 0.256   |
| Sex: Male [ref. Female]            | 3.97            | (−5.26, 13.2)                            | 0.389   |
| Gestation Age [weeks]              | 4.94            | (2.83, 7.05)                             | < 0.001 |
| Bayley - 1 Year: Cognitive         |                 |                                          |         |
| Average Total Intake [kcal/kg/day] | −0.17           | (−0.51, 0.17)                            | 0.322   |
| Sex: Male [ref. Female]            | 7.42            | (−2.46, 17.29)                           | 0.137   |
| Gestation Age [weeks]              | 4.98            | (2.75, 7.21)                             | < 0.001 |
| Bayley - 1 Year: Cognitive         |                 |                                          |         |
| Average Total Intake [kcal/kg/day] | −2.75           | (−11.13, 5.63)                           | 0.511   |
| Sex: Male [ref. Female]            | 9.07            | (−0.06, 18.21)                           | 0.052   |
| Gestation Age [weeks]              | 3.48            | (1.33, 5.62)                             | 0.002   |
| Bayley - 1 Year: Cognitive         |                 |                                          |         |
| Average Total Intake [kcal/kg/day] | −3.76           | (−12.22, 4.7)                            | 0.374   |

|                                    |       |                 |         |
|------------------------------------|-------|-----------------|---------|
| Sex: Male [ref. Female]            | 3.67  | (−5.59, 12.92)  | 0.428   |
| Gestation Age [weeks]              | 4.85  | (2.64, 7.06)    | < 0.001 |
| Bayley - 1 Year: Cognitive         |       |                 |         |
| Average Total Intake [kcal/kg/day] | −5.01 | (−14.07, 4.05)  | 0.27    |
| Sex: Male [ref. Female]            | 7.18  | (−2.63, 16.98)  | 0.147   |
| Gestation Age [weeks]              | 5.12  | (2.82, 7.43)    | < 0.001 |
| Bayley - 1 Year: Cognitive         |       |                 |         |
| Average Total Intake [kcal/kg/day] | 0.23  | (−0.07, 0.53)   | 0.135   |
| Sex: Male [ref. Female]            | 9.82  | (0.83, 18.82)   | 0.033   |
| Gestation Age [weeks]              | 3.13  | (1.52, 4.75)    | < 0.001 |
| Bayley - 1 Year: Cognitive         |       |                 |         |
| Average Total Intake [kcal/kg/day] | 0.11  | (−0.21, 0.43)   | 0.482   |
| Sex: Male [ref. Female]            | 4     | (−5.42, 13.42)  | 0.396   |
| Gestation Age [weeks]              | 4.31  | (2.58, 6.04)    | < 0.001 |
| Bayley - 1 Year: Cognitive         |       |                 |         |
| Average Total Intake [kcal/kg/day] | 0.13  | (−0.2, 0.46)    | 0.431   |
| Sex: Male [ref. Female]            | 7.45  | (−2.51, 17.42)  | 0.139   |
| Gestation Age [weeks]              | 4.37  | (2.59, 6.16)    | < 0.001 |
| Bayley - 1 Year: Cognitive         |       |                 |         |
| Average Total Intake [kcal/kg/day] | 1.66  | (−8.45, 11.77)  | 0.741   |
| Sex: Male [ref. Female]            | 9.13  | (−0.13, 18.39)  | 0.053   |
| Gestation Age [weeks]              | 3.19  | (1.25, 5.14)    | 0.002   |
| Bayley - 1 Year: Cognitive         |       |                 |         |
| Average Total Intake [kcal/kg/day] | −2    | (−12.32, 8.31)  | 0.697   |
| Sex: Male [ref. Female]            | 3.11  | (−6.33, 12.55)  | 0.51    |
| Gestation Age [weeks]              | 4.01  | (1.97, 6.04)    | < 0.001 |
| Bayley - 1 Year: Cognitive         |       |                 |         |
| Average Total Intake [kcal/kg/day] | −0.82 | (−11.86, 10.22) | 0.881   |
| Sex: Male [ref. Female]            | 6.77  | (−3.27, 16.82)  | 0.181   |
| Gestation Age [weeks]              | 4.22  | (2.11, 6.33)    | < 0.001 |



**Table S11.** Bayley Score - Year 2 - Model 1 (Adjusted for Sex, Gestational Age, and Age at Test [VEP/ERP Only]).

|                                        |                        |                                          |                |
|----------------------------------------|------------------------|------------------------------------------|----------------|
|                                        |                        |                                          |                |
| Bayley - 2 year: Cognitive             |                        | Control (N = 13)   Intervention (N = 16) |                |
| Study Arm: Intervention [ref. Control] |                        |                                          |                |
| Sex: Male [ref. Female]                |                        |                                          |                |
| Gestation Age [weeks]                  |                        |                                          |                |
| Bayley - 2 year: Cognitive             |                        | Control (N = 13)   Intervention (N = 16) |                |
| Study Arm: Intervention [ref. Control] |                        |                                          |                |
| Sex: Male [ref. Female]                |                        |                                          |                |
| Gestation Age [weeks]                  |                        |                                          |                |
| Bayley - 2 year: Cognitive             |                        | Control (N = 13)   Intervention (N = 16) |                |
| Study Arm: Intervention [ref. Control] |                        |                                          |                |
| Sex: Male [ref. Female]                |                        |                                          |                |
| Gestation Age [weeks]                  |                        |                                          |                |
|                                        | <b>Effect Estimate</b> | <b>95% CI</b>                            | <b>p-value</b> |
| Bayley - 2 year: Cognitive             |                        |                                          |                |
| Study Arm: Intervention [ref. Control] | 0.54                   | (-14.64, 15.73)                          | 0.942          |
| Sex: Male [ref. Female]                | -2.66                  | (-18.75, 13.42)                          | 0.736          |
| Gestation Age [weeks]                  | 3.44                   | (0.44, 6.45)                             | 0.027          |
| Bayley - 2 year: Language              |                        |                                          |                |
| Study Arm: Intervention [ref. Control] | -1.33                  | (-17.39, 14.72)                          | 0.865          |
| Sex: Male [ref. Female]                | -2.36                  | (-19.45, 14.74)                          | 0.778          |
| Gestation Age [weeks]                  | 3.18                   | (0.03, 6.33)                             | 0.048          |
| Bayley - 2 year: Motor                 |                        |                                          |                |
| Study Arm: Intervention [ref. Control] | -4.43                  | (-17.71, 8.85)                           | 0.499          |
| Sex: Male [ref. Female]                | -2.08                  | (-16.42, 12.25)                          | 0.767          |
| Gestation Age [weeks]                  | 4.81                   | (2.17, 7.44)                             | < 0.001        |

**Table S12.** Bayley Score - Year 2 - Model 2 (Adjusted for Sex, Gestational Age, Kcal/kg from Feeds, and Age at Test [VEP/ERP Only]).

|                                               |                                          |                 |                |
|-----------------------------------------------|------------------------------------------|-----------------|----------------|
|                                               |                                          |                 |                |
| Bayley - 2 year: Cognitive                    | Control (N = 13)   Intervention (N = 16) |                 |                |
| Study Arm: Intervention [ref. Control]        |                                          |                 |                |
| Sex: Male [ref. Female]                       |                                          |                 |                |
| Gestation Age [weeks]                         |                                          |                 |                |
| Average Enteral Intake Days 2–8 [kcal/kg/day] |                                          |                 |                |
| Bayley - 2 year: Cognitive                    | Control (N = 13)   Intervention (N = 16) |                 |                |
| Study Arm: Intervention [ref. Control]        |                                          |                 |                |
| Sex: Male [ref. Female]                       |                                          |                 |                |
| Gestation Age [weeks]                         |                                          |                 |                |
| Average Enteral Intake Days 2–8 [kcal/kg/day] |                                          |                 |                |
| Bayley - 2 year: Cognitive                    | Control (N = 13)   Intervention (N = 16) |                 |                |
| Study Arm: Intervention [ref. Control]        |                                          |                 |                |
| Sex: Male [ref. Female]                       |                                          |                 |                |
| Gestation Age [weeks]                         |                                          |                 |                |
| Average Enteral Intake Days 2–8 [kcal/kg/day] |                                          |                 |                |
|                                               | <b>Effect Estimate</b>                   | <b>95% CI</b>   | <b>p-value</b> |
| Bayley - 2 year: Cognitive                    |                                          |                 |                |
| Study Arm: Intervention [ref. Control]        | 2.13                                     | (−15.43, 19.69) | 0.804          |
| Sex: Male [ref. Female]                       | −2.69                                    | (−19.1, 13.72)  | 0.738          |
| Gestation Age [weeks]                         | 2.71                                     | (−2.18, 7.6)    | 0.263          |
| Average Enteral Intake Days 2–8 [kcal/kg/day] | 0.14                                     | (−0.59, 0.87)   | 0.695          |
| Bayley - 2 year: Cognitive                    |                                          |                 |                |
| Study Arm: Intervention [ref. Control]        | 1.77                                     | (−16.64, 20.18) | 0.844          |
| Sex: Male [ref. Female]                       | −2.33                                    | (−19.64, 14.98) | 0.783          |
| Gestation Age [weeks]                         | 1.81                                     | (−3.18, 6.79)   | 0.46           |
| Average Enteral Intake Days 2–8 [kcal/kg/day] | 0.27                                     | (−0.48, 1.03)   | 0.465          |
| Bayley - 2 year: Cognitive                    |                                          |                 |                |
| Study Arm: Intervention [ref. Control]        | −4.15                                    | (−19.51, 11.22) | 0.583          |
| Sex: Male [ref. Female]                       | −2.09                                    | (−16.74, 12.57) | 0.771          |
| Gestation Age [weeks]                         | 4.67                                     | (0.36, 8.98)    | 0.035          |
| Average Enteral Intake Days 2–8 [kcal/kg/day] | 0.03                                     | (−0.63, 0.68)   | 0.936          |

**Table S13.** Bayley Score - Year 2 - Model 3: Multivariable Condition by Specific Intake Days 2–8.

|                                    |  |                                          |  |
|------------------------------------|--|------------------------------------------|--|
|                                    |  |                                          |  |
| Bayley - 2 Year: Cognitive         |  | Control (N = 13)   Intervention (N = 16) |  |
| Average Total Intake [kcal/kg/day] |  |                                          |  |
| Sex: Male [ref. Female]            |  |                                          |  |
| Gestation Age [weeks]              |  |                                          |  |
| Bayley - 2 Year: Cognitive         |  | Control (N = 13)   Intervention (N = 16) |  |
| Average Total Intake [kcal/kg/day] |  |                                          |  |
| Sex: Male [ref. Female]            |  |                                          |  |
| Gestation Age [weeks]              |  |                                          |  |
| Bayley - 2 Year: Cognitive         |  | Control (N = 13)   Intervention (N = 16) |  |
| Average Total Intake [kcal/kg/day] |  |                                          |  |
| Sex: Male [ref. Female]            |  |                                          |  |
| Gestation Age [weeks]              |  |                                          |  |
| Bayley - 2 Year: Cognitive         |  | Control (N = 13)   Intervention (N = 16) |  |
| Average Total Intake [kcal/kg/day] |  |                                          |  |
| Sex: Male [ref. Female]            |  |                                          |  |
| Gestation Age [weeks]              |  |                                          |  |
| Bayley - 2 Year: Cognitive         |  | Control (N = 13)   Intervention (N = 16) |  |
| Average Total Intake [kcal/kg/day] |  |                                          |  |
| Sex: Male [ref. Female]            |  |                                          |  |
| Gestation Age [weeks]              |  |                                          |  |
| Bayley - 2 Year: Cognitive         |  | Control (N = 13)   Intervention (N = 16) |  |
| Average Total Intake [kcal/kg/day] |  |                                          |  |
| Sex: Male [ref. Female]            |  |                                          |  |
| Gestation Age [weeks]              |  |                                          |  |
| Bayley - 2 Year: Cognitive         |  | Control (N = 13)   Intervention (N = 16) |  |
| Average Total Intake [kcal/kg/day] |  |                                          |  |
| Sex: Male [ref. Female]            |  |                                          |  |
| Gestation Age [weeks]              |  |                                          |  |
| Bayley - 2 Year: Cognitive         |  | Control (N = 13)   Intervention (N = 16) |  |
| Average Total Intake [kcal/kg/day] |  |                                          |  |
| Sex: Male [ref. Female]            |  |                                          |  |
| Gestation Age [weeks]              |  |                                          |  |
| Bayley - 2 Year: Cognitive         |  | Control (N = 13)   Intervention (N = 16) |  |
| Average Total Intake [kcal/kg/day] |  |                                          |  |
| Sex: Male [ref. Female]            |  |                                          |  |
| Gestation Age [weeks]              |  |                                          |  |
| Bayley - 2 Year: Cognitive         |  | Control (N = 13)   Intervention (N = 16) |  |
| Average Total Intake [kcal/kg/day] |  |                                          |  |
| Sex: Male [ref. Female]            |  |                                          |  |
| Gestation Age [weeks]              |  |                                          |  |
| Bayley - 2 Year: Cognitive         |  | Control (N = 13)   Intervention (N = 16) |  |
| Average Total Intake [kcal/kg/day] |  |                                          |  |
| Sex: Male [ref. Female]            |  |                                          |  |
| Gestation Age [weeks]              |  |                                          |  |
| Bayley - 2 Year: Cognitive         |  | Control (N = 13)   Intervention (N = 16) |  |
| Average Total Intake [kcal/kg/day] |  |                                          |  |
| Sex: Male [ref. Female]            |  |                                          |  |
| Gestation Age [weeks]              |  |                                          |  |

| Bayley - 2 Year: Cognitive         | Control (N = 13)   Intervention (N = 16) |                 |         |
|------------------------------------|------------------------------------------|-----------------|---------|
| Average Total Intake [kcal/kg/day] |                                          |                 |         |
| Sex: Male [ref. Female]            |                                          |                 |         |
| Gestation Age [weeks]              |                                          |                 |         |
| Bayley - 2 Year: Cognitive         | Control (N = 13)   Intervention (N = 16) |                 |         |
| Average Total Intake [kcal/kg/day] |                                          |                 |         |
| Sex: Male [ref. Female]            |                                          |                 |         |
| Gestation Age [weeks]              |                                          |                 |         |
| Bayley - 2 Year: Cognitive         | Control (N = 13)   Intervention (N = 16) |                 |         |
| Average Total Intake [kcal/kg/day] |                                          |                 |         |
| Sex: Male [ref. Female]            |                                          |                 |         |
| Gestation Age [weeks]              |                                          |                 |         |
| Bayley - 2 Year: Cognitive         | Control (N = 13)   Intervention (N = 16) |                 |         |
| Average Total Intake [kcal/kg/day] |                                          |                 |         |
| Sex: Male [ref. Female]            |                                          |                 |         |
| Gestation Age [weeks]              |                                          |                 |         |
| Bayley - 2 Year: Cognitive         | Control (N = 13)   Intervention (N = 16) |                 |         |
| Average Total Intake [kcal/kg/day] |                                          |                 |         |
| Sex: Male [ref. Female]            |                                          |                 |         |
| Gestation Age [weeks]              |                                          |                 |         |
|                                    | Effect Estimate                          | 95% CI          | p-value |
| Bayley - 2 Year: Cognitive         |                                          |                 |         |
| Average Total Intake [kcal/kg/day] | −0.2                                     | (−0.94, 0.53)   | 0.571   |
| Sex: Male [ref. Female]            | −3.19                                    | (−18.77, 12.39) | 0.676   |
| Gestation Age [weeks]              | 4.59                                     | (−0.36, 9.54)   | 0.068   |
| Bayley - 2 Year: Cognitive         |                                          |                 |         |
| Average Total Intake [kcal/kg/day] | −0.07                                    | (−0.9, 0.76)    | 0.865   |
| Sex: Male [ref. Female]            | −2.29                                    | (−19.2, 14.62)  | 0.782   |
| Gestation Age [weeks]              | 3.49                                     | (−1.77, 8.75)   | 0.183   |
| Bayley - 2 Year: Cognitive         |                                          |                 |         |
| Average Total Intake [kcal/kg/day] | −0.16                                    | (−0.81, 0.5)    | 0.626   |
| Sex: Male [ref. Female]            | −1.22                                    | (−15.22, 12.78) | 0.859   |
| Gestation Age [weeks]              | 5.46                                     | (1.1, 9.82)     | 0.016   |
| Bayley - 2 Year: Cognitive         |                                          |                 |         |
| Average Total Intake [kcal/kg/day] | 8.59                                     | (−28.73, 45.92) | 0.639   |
| Sex: Male [ref. Female]            | −3.55                                    | (−19.44, 12.34) | 0.649   |
| Gestation Age [weeks]              | 3.05                                     | (−0.39, 6.49)   | 0.08    |
| Bayley - 2 Year: Cognitive         |                                          |                 |         |
| Average Total Intake [kcal/kg/day] | 6.17                                     | (−33.51, 45.85) | 0.751   |
| Sex: Male [ref. Female]            | −2.45                                    | (−19.21, 14.32) | 0.765   |
| Gestation Age [weeks]              | 2.87                                     | (−0.72, 6.45)   | 0.112   |
| Bayley - 2 Year: Cognitive         |                                          |                 |         |
| Average Total Intake [kcal/kg/day] | 13.15                                    | (−20.17, 46.47) | 0.424   |
| Sex: Male [ref. Female]            | −1.98                                    | (−16.07, 12.11) | 0.775   |
| Gestation Age [weeks]              | 3.98                                     | (0.94, 7.02)    | 0.012   |
| Bayley - 2 Year: Cognitive         |                                          |                 |         |
| Average Total Intake [kcal/kg/day] | 0.1                                      | (−0.53, 0.73)   | 0.749   |
| Sex: Male [ref. Female]            | −3.1                                     | (−18.81, 12.61) | 0.687   |
| Gestation Age [weeks]              | 3.01                                     | (−1.13, 7.15)   | 0.146   |
| Bayley - 2 Year: Cognitive         |                                          |                 |         |
| Average Total Intake [kcal/kg/day] | 0.24                                     | (−0.41, 0.89)   | 0.46    |
| Sex: Male [ref. Female]            | −2.7                                     | (−19.17, 13.77) | 0.737   |
| Gestation Age [weeks]              | 2.02                                     | (−2.34, 6.38)   | 0.348   |
| Bayley - 2 Year: Cognitive         |                                          |                 |         |

|                                    |       |                 |         |
|------------------------------------|-------|-----------------|---------|
| Average Total Intake [kcal/kg/day] | 0.11  | (−0.46, 0.68)   | 0.698   |
| Sex: Male [ref. Female]            | −1.2  | (−15.25, 12.86) | 0.862   |
| Gestation Age [weeks]              | 4.11  | (0.4, 7.83)     | 0.031   |
| Bayley - 2 Year: Cognitive         |       |                 |         |
| Average Total Intake [kcal/kg/day] | 2.74  | (−11.96, 17.44) | 0.704   |
| Sex: Male [ref. Female]            | −2.73 | (−18.31, 12.85) | 0.721   |
| Gestation Age [weeks]              | 2.98  | (−0.94, 6.9)    | 0.13    |
| Bayley - 2 Year: Cognitive         |       |                 |         |
| Average Total Intake [kcal/kg/day] | 3.75  | (−11.56, 19.06) | 0.617   |
| Sex: Male [ref. Female]            | −1.98 | (−18.44, 14.49) | 0.806   |
| Gestation Age [weeks]              | 2.46  | (−1.72, 6.63)   | 0.236   |
| Bayley - 2 Year: Cognitive         |       |                 |         |
| Average Total Intake [kcal/kg/day] | 1.9   | (−11.37, 15.17) | 0.771   |
| Sex: Male [ref. Female]            | −0.81 | (−14.77, 13.15) | 0.906   |
| Gestation Age [weeks]              | 4.28  | (0.76, 7.8)     | 0.019   |
| Bayley - 2 Year: Cognitive         |       |                 |         |
| Average Total Intake [kcal/kg/day] | −0.17 | (−0.68, 0.35)   | 0.509   |
| Sex: Male [ref. Female]            | −3.63 | (−19.32, 12.06) | 0.638   |
| Gestation Age [weeks]              | 3.6   | (0.68, 6.52)    | 0.018   |
| Bayley - 2 Year: Cognitive         |       |                 |         |
| Average Total Intake [kcal/kg/day] | −0.2  | (−0.74, 0.35)   | 0.462   |
| Sex: Male [ref. Female]            | −3.42 | (−20.25, 13.4)  | 0.678   |
| Gestation Age [weeks]              | 3.21  | (0.12, 6.31)    | 0.042   |
| Bayley - 2 Year: Cognitive         |       |                 |         |
| Average Total Intake [kcal/kg/day] | −0.15 | (−0.61, 0.31)   | 0.51    |
| Sex: Male [ref. Female]            | −1.67 | (−15.76, 12.41) | 0.809   |
| Gestation Age [weeks]              | 4.72  | (2.12, 7.32)    | < 0.001 |
| Bayley - 2 Year: Cognitive         |       |                 |         |
| Average Total Intake [kcal/kg/day] | −3.17 | (−28.35, 22.01) | 0.797   |
| Sex: Male [ref. Female]            | −2.68 | (−18.31, 12.95) | 0.726   |
| Gestation Age [weeks]              | 3.21  | (−0.38, 6.8)    | 0.078   |
| Bayley - 2 Year: Cognitive         |       |                 |         |
| Average Total Intake [kcal/kg/day] | −8.34 | (−34.83, 18.16) | 0.522   |
| Sex: Male [ref. Female]            | −1.9  | (−18.3, 14.51)  | 0.813   |
| Gestation Age [weeks]              | 2.39  | (−1.52, 6.3)    | 0.219   |
| Bayley - 2 Year: Cognitive         |       |                 |         |
| Average Total Intake [kcal/kg/day] | −0.59 | (−23.28, 22.09) | 0.958   |
| Sex: Male [ref. Female]            | −0.84 | (−14.84, 13.16) | 0.903   |
| Gestation Age [weeks]              | 4.57  | (−1.34, 7.8)    | 0.007   |
